# Supplementary material for: A Chitinase-like Protein in the Lung and Circulation of Patients with Severe Asthma
Source: Atypon-hosted journal article supplement (doi:10.1056/nejmoa073600), 2007-11-14
Supplement: nejm_chupp_2016sa1.pdf [file nejm_chupp_2016sa1.pdf]

## Supplementary Appendix

This appendix has been provided by the authors to give readers additional information about their work.

Supplement to: Chupp GL, Lee CG, Jarjour N, et al. A chitinase-like protein in the lung and circulation of patients with severe asthma. *N Engl J Med* 2007;357:2016-27.

**Supplement to the Text for NEJM #07-3600**

**Table 1. Inclusion/Exclusion Criteria for the three Asthma Cohorts**

| <b>Yale University</b>                                                                                                  | <b>University of Paris</b>                                                                                                                                  | <b>University of Wisconsin</b>                                                                                                                                                                                                                                                                                                                                                                                            |
|-------------------------------------------------------------------------------------------------------------------------|-------------------------------------------------------------------------------------------------------------------------------------------------------------|---------------------------------------------------------------------------------------------------------------------------------------------------------------------------------------------------------------------------------------------------------------------------------------------------------------------------------------------------------------------------------------------------------------------------|
| <p><b><u>All Subjects</u></b></p> <p>≥ 18 years of age</p> <p>≤ 10 pack years of smoking</p>                            | <p><b><u>All Subjects</u></b></p> <p>≥ 18 years of age</p> <p>≤ 5 pack years of smoking</p>                                                                 | <p><b><u>All Subjects</u></b></p> <p>18-55 years of age</p> <p>≤ 10 pack years of smoking</p>                                                                                                                                                                                                                                                                                                                             |
| <p><b><u>Normals</u></b></p> <p>No history of respiratory disease</p>                                                   | <p><b><u>Normals</u></b></p> <p>No history of allergies</p> <p>Normal skin prick tests</p> <p>Normal lung function without bronchodilator reversibility</p> | <p><b><u>Normals</u></b></p> <p>No history of allergies</p> <p>Normal skin prick tests</p> <p>Normal lung function without bronchodilator reversibility</p>                                                                                                                                                                                                                                                               |
| <p><b><u>Asthmatics</u></b></p> <p>History, physical, and physiologic testing consistent with a diagnosis of asthma</p> | <p><b><u>Asthmatics</u></b></p> <p>History, physical, and physiologic testing consistent with a diagnosis of asthma</p>                                     | <p><b><u>Asthmatics</u></b></p> <p>Historical evidence of bronchodilator reversibility indicated by a 12% (and 200 ml) increase in FEV1 after:</p> <ol style="list-style-type: none"> <li>1) Administration of a short acting β-agonist</li> <li>2) Treatment with an inhaled corticosteroid</li> <li>3) Oral prednisone burst</li> </ol> <p align="center">OR</p> <p>Methacholine reactivity (PC20) of &lt; 8 mg/ml.</p> |
